# Supplementary material for: Exon expression profiling reveals stimulus-mediated exon use in neural cells
Source: PubMed Central journal article supplement (PMC2374990; doi:10.1186/gb-2007-8-8-r159), 2007-08-02
Supplement: gb-2007-8-8-r159-S5.pdf [file gb-2007-8-8-r159-S5.pdf]

Additional data file 5  
Gene Ontology Categories Enriched in the KCI-Transcript dataset

| Gene Ontology Category              | Transcript Cluster 1 down-regulated | p-value  | Transcript Cluster 2 up-regulated | p-value  | Transcript Cluster 3 TPG-up-regulated | p-value  | Transcript Cluster 4 intermediate-up-regulated | p-value  | total |
|-------------------------------------|-------------------------------------|----------|-----------------------------------|----------|---------------------------------------|----------|------------------------------------------------|----------|-------|
| nucleotide metabolism               | 81                                  | 6.55E-20 |                                   |          |                                       |          |                                                |          | 1227  |
| lipid metabolism                    | 45                                  | 1.16E-21 |                                   |          |                                       |          |                                                |          | 468   |
| glucose metabolism                  | 22                                  | 1.67E-11 |                                   |          |                                       |          |                                                |          | 214   |
| cell cycle                          | 82                                  | 9.28E-30 |                                   |          |                                       |          |                                                |          | 871   |
| mitochondria                        | 100                                 | 3.65E-58 |                                   |          |                                       |          |                                                |          | 771   |
| cellular metabolism                 | 456                                 | 1.16E-26 |                                   |          |                                       |          |                                                |          | 12279 |
| intrinsic plasma membrane           |                                     |          | 34                                | 1.14E-19 |                                       |          |                                                |          | 1363  |
| ion transport                       |                                     |          | 20                                | 3.53E-03 |                                       |          |                                                |          | 1528  |
| cation channel activity             |                                     |          | 10                                | 5.56E-03 |                                       |          |                                                |          | 443   |
| calcium ion binding                 |                                     |          | 20                                | 2.16E-03 |                                       |          |                                                |          | 1348  |
| nucleosome                          |                                     |          |                                   |          | 7                                     | 1.89E-06 |                                                |          | 122   |
| ER-Golgi intermediate compartment   |                                     |          |                                   |          | 3                                     | 1.08E-03 |                                                |          | 31    |
| Retrograde vesicle trafficking      |                                     |          |                                   |          | 2                                     | 7.03E-03 |                                                |          | 16    |
| transcription from Pol II promoters |                                     |          |                                   |          |                                       |          | 3                                              | 1.44E-03 | 429   |

Number of transcripts and the p-value associated with each gene ontology category per Transcript Cluster. The final column lists the total number of genes in each GO category.
