# Supplementary material for: Exon expression profiling reveals stimulus-mediated exon use in neural cells
Source: PubMed Central journal article supplement (PMC2374990; doi:10.1186/gb-2007-8-8-r159), 2007-08-02
Supplement: gb-2007-8-8-r159-S8.pdf [file gb-2007-8-8-r159-S8.pdf]

Additional data file 8

Gene Ontology Categories Enriched in the KCI-Exon dataset

| Gene Ontology Category        | 0.5h | p-value  | 1.5h | p-value  | 3h | p-value  | 6h  | p-value  | 12h  | p-value  | 24h  | p-value  | total |
|-------------------------------|------|----------|------|----------|----|----------|-----|----------|------|----------|------|----------|-------|
| apoptosis                     |      |          |      |          |    |          |     |          | 118  | 5.91E-12 | 122  | 1.28E-12 | 692   |
| calcium ion binding           | 53   | 0.00344  | 51   | 4.07E-05 | 46 | 0.000908 | 70  | 4.02E-05 | 176  | 3.09E-06 | 178  | 8.03E-06 | 1348  |
| calmodulin binding            | 13   | 0.000975 | 12   | 0.000813 |    |          |     |          | 39   | 6.58E-13 | 36   | 1.17E-09 | 139   |
| cell adhesion                 | 62   | 3.47E-15 | 44   | 1.23E-07 | 54 | 3.11E-16 | 51  | 0.000325 | 137  | 1.01E-07 | 142  | 2.38E-08 | 946   |
| cell cycle                    |      |          |      |          |    |          | 55  | 3.72E-07 | 178  | 2.49E-30 | 195  | 3.07E-39 | 871   |
| cellular metabolism           |      |          |      |          |    |          | 445 | 5.40E-07 | 1375 | 1.45E-25 | 1434 | 1.94E-30 | 12279 |
| endoplasmic reticulum         |      |          |      |          |    |          |     |          | 129  | 1.70E-17 | 132  | 8.02E-18 | 685   |
| intrinsic plasma membrane     | 94   | 5.30E-26 | 70   | 6.58E-16 | 71 | 8.97E-18 | 65  | 0.0017   | 204  | 3.07E-13 | 203  | 1.34E-11 | 1363  |
| mitochondria                  |      |          |      |          |    |          |     |          | 155  | 3.70E-25 | 151  | 2.17E-21 | 771   |
| mRNA processing               |      |          |      |          |    |          |     |          | 64   | 4.23E-17 | 68   | 1.47E-21 | 243   |
| RNA splicing                  |      |          |      |          |    |          |     |          | 39   | 1.96E-11 | 43   | 1.75E-14 | 148   |
| transcription                 |      |          |      |          |    |          | 37  | 7.88E-07 | 100  | 2.67E-15 | 108  | 6.65E-19 | 507   |
| phosphate transport           | 22   | 2.64E-11 | 16   | 0.000274 | 14 | 0.00195  |     |          |      |          |      |          | 215   |
| regulation of kinase activity | 16   | 2.80E-05 |      |          | 10 | 0.00996  |     |          |      |          |      |          | 149   |
| protein kinase cascade        |      |          |      |          |    |          | 28  | 2.35E-08 |      |          |      |          | 303   |

Number of genes and the p-value associated with each gene ontology category, by time point. The final column lists the total number of genes in each GO category.
